# Supplementary material for: Reduced order modeling and analysis of the human complement system
Source: PubMed Central journal article supplement (PMC5695804; doi:10.1371/journal.pone.0187373), 2017-11-20
Supplement: pone.0187373.s002.pdf [file pone.0187373.s002.pdf]

**S2 Table.** Experimental measurements used in modeling training and validation from Morad and coworkers [35]. Two sets of C3a and C5a measurements were used for model training while three were used for validation. The information of the experimental data, its usage in this work and its location within the original publication is described below.

| Protein | zymosan ( $\mu M$ ) | Figure Number | Model Utilization |
|---------|---------------------|---------------|-------------------|
| C3a     | 0                   | Fig 2a        | Training          |
|         | 1.0                 | Fig 2e        | Training          |
|         | 0.001               | Fig 2b        | Prediction        |
|         | 0.01                | Fig 2c        | Prediction        |
|         | 0.1                 | Fig 2d        | Prediction        |
| C5a     | 0                   | Fig 3a(i)     | Training          |
|         | 1.0                 | Fig 3c        | Training          |
|         | 0.001               | Fig 3a(ii)    | Prediction        |
|         | 0.01                | Fig 3a(iii)   | Prediction        |
|         | 0.1                 | Fig 3b        | Prediction        |
